# Supplementary material
Source: publisher site journal article supplement (https://www.dovepress.com/article/144171)
Supplement: Supplementary file 1 [file get_supplementary_file.php]

## Supplementary materials

**Table S1.** List of 92 proteins measured by Proseek Oncology lv2 assay

| Abbreviation | Protein Name                                   | Uniprot ID. |
|--------------|------------------------------------------------|-------------|
| AM           | Adrenomedullin                                 | P35318      |
| AREG         | Amphiregulin                                   | P15514      |
| BAFF         | B-cell-activating factor                       | Q9Y275      |
| CA125        | Carcinoma antigen 125                          | Q8WXI7      |
| CAIX         | Carbonic anhydrase IX                          | Q16790      |
| CASP3        | Caspase-3                                      | P42574      |
| CCL19        | C-C motif chemokine 19                         | Q99731      |
| CD40L        | CD40 ligand                                    | P29965      |
| CD69         | Early activation antigen CD69                  | Q07108      |
| CDH3         | Cadherin-3                                     | P22223      |
| CDKN1A       | Cyclin-dependent kinase inhibitor 1            | P38936      |
| CEA          | Carcinoembryonic antigen                       | P06731      |
| CSF1         | Macrophage colony-stimulating factor 1         | P09603      |
| CSTB         | Cystatin-B                                     | P04080      |
| CXCL10       | C-X-C motif chemokine 10                       | P02778      |
| CXCL11       | C-X-C motif chemokine 11                       | O14625      |
| CXCL13       | C-X-C motif chemokine 13                       | O43927      |
| CXCL5        | C-X-C motif chemokine 5                        | P42830      |
| CXCL9        | C-X-C motif chemokine 9                        | Q07325      |
| EGFR         | Epidermal growth factor receptor               | P00533      |
| eIF4B        | Eukaryotic translation initiation factor 4B    | P23588      |
| EMMPRIN      | Extracellular matrix metalloproteinase inducer | P35613      |
| EpCAM        | Epithelial cell adhesion molecule              | P16422      |
| EPO          | Erythropoietin                                 | P01588      |
| ErbB2/HER2   | Receptor tyrosine-protein kinase erbB-2        | P04626      |
| ErbB3/HER3   | Receptor tyrosine-protein kinase erbB-3        | P21860      |
| ErbB4/HER4   | Receptor tyrosine-protein kinase erbB-4        | Q15303      |
| EZR          | Ezrin                                          | P15311      |
| FADD         | FAS-associated death domain protein            | Q13158      |
| FAS          | Fas cell surface death receptor                | P25445      |
| FasL         | Fas antigen ligand                             | P48023      |
| Flt3L        | Fms-related tyrosine kinase 3 ligand           | P49771      |
| FRalpha      | Folate receptor alpha                          | P15328      |
| FS           | Follistatin                                    | P19883      |
| FUR          | Furin                                          | P09958      |

**Table S1.** List of 92 proteins measured by Proseek Oncology lv2 assay

| <b>Abbreviation</b> | <b>Protein Name</b>                                           | <b>Uniprot ID.</b>       |
|---------------------|---------------------------------------------------------------|--------------------------|
| GDF-15              | Growth differentiation factor 15                              | Q99988                   |
| GH                  | Growth hormone                                                | P01241                   |
| HBEGF               | Proheparin-binding EGF-like growth factor                     | Q99075                   |
| HE4                 | WAP four-disulfide core domain protein 2                      | Q14508                   |
| HGF                 | Hepatocyte growth factor                                      | P14210                   |
| hK11                | Kallikrein-11                                                 | Q9UBX7                   |
| ICOSLG              | ICOS ligand                                                   | O75144                   |
| IFN gamma           | Interferon gamma                                              | P01579                   |
| IL-12               | Interleukin-12                                                | Alpha:P29459/Beta:P29460 |
| IL-17RB             | Interleukin-17 receptor beta                                  | Q9NRM6                   |
| IL-1ra              | Interleukin-1 receptor antagonist protein                     | P18510                   |
| IL-2                | Interleukin-2                                                 | P60568                   |
| IL-6                | Interleukin-6                                                 | P05231                   |
| IL-6RA              | Interleukin-6 receptor subunit alpha                          | P08887                   |
| IL-7                | Interleukin-7                                                 | P13232                   |
| IL-8                | Interleukin-8                                                 | P10145                   |
| ILT3                | Immunoglobulin-like transcript 3                              | Q8NHJ6                   |
| ITGA1               | Integrin alpha-1                                              | P56199                   |
| KLK6                | Kallikrein-6                                                  | Q92876                   |
| LAP-TGF-beta-1      | Latency-associated peptide-Transforming growth factor-beta-1  | P01137                   |
| LITAF               | Lipopolysaccharide-induced tumor necrosis factor-alpha factor | Q99732                   |
| LYN                 | Tyrosine-protein kinase Lyn                                   | P07948                   |
| MCP1                | Monocyte chemotactic protein 1                                | P13500                   |
| MIA                 | Melanoma-derived growth regulatory protein                    | Q16674                   |
| MICA                | MHC class I polypeptide-related sequence A                    | Q29983                   |
| MK                  | Midkine                                                       | P21741                   |
| MMP-1               | Matrix metalloproteinase-1                                    | P03956                   |
| MYD88               | Myeloid differentiation primary response protein MyD88        | Q99836                   |
| NEMO                | NF-kappa-B essential modulator                                | Q9Y6K9                   |
| NTRK3               | NT-3 growth factor receptor                                   | Q16288                   |
| PARK7               | Parkinson disease protein 7                                   | Q99497                   |
| PDGF subunit B      | Platelet-derived growth factor subunit B                      | P01127                   |
| PECAM-1             | Platelet endothelial cell adhesion molecule-1                 | P16284                   |
| PIGF                | Placenta growth factor                                        | P49763                   |
| PRL                 | Prolactin                                                     | P01236                   |
| PRSS8               | Prostasin                                                     | Q16651                   |
| PTPN22              | Tyrosine-protein phosphatase non-receptor type 22             | Q9Y2R2                   |

**Table S1.** List of 92 proteins measured by Proseek Oncology lv2 assay

| <b>Abbreviation</b> | <b>Protein Name</b>                                  | <b>Uniprot ID.</b> |
|---------------------|------------------------------------------------------|--------------------|
| REG 4               | Regenerating islet-derived protein 4                 | Q9BYZ8             |
| SCF                 | Stem cell factor                                     | P21583             |
| SELE                | E-selectin                                           | P16581             |
| TF                  | Tissue factor                                        | P13726             |
| TGF-alpha           | Transforming growth factor-alpha                     | Q9UQ91             |
| THPO                | Thrombopoietin                                       | P40225             |
| TIE2                | Tyrosine kinase with Ig and EGF homology domains-2   | Q02763             |
| TNF                 | Tumor necrosis factor                                | P01375             |
| TNFR-1              | Tumor necrosis factor receptor-1                     | P19438             |
| TNFR-2              | Tumor necrosis factor receptor-2                     | P20333             |
| TNFRSF-4            | Tumor necrosis factor receptor superfamily member 4  | P43489             |
| TNFSF-14            | Tumor necrosis factor receptor superfamily member 14 | Q92956             |
| TR-AP               | Tartrate-resistant acid phosphatase type 5           | P13686             |
| TRAILR-2            | TNF-related apoptosis-inducing ligand receptor-2     | O14763             |
| U-PAR               | Urokinase plasminogen activator surface receptor     | Q03405             |
| VE-statin           | Vascular endothelial statin                          | Q9UHF1             |
| VEGF-A              | Vascular endothelial growth factor-A                 | P15692             |
| VEGF-D              | Vascular endothelial growth factor-D                 | O43915             |
| VEGFR-2             | Vascular endothelial growth factor receptor-2        | P35968             |
| VIM                 | Vimentin                                             | P08670             |

**Table S2.** Diagnostic performance of 92 protein biomarkers in the discovery set and the validation set

| Protein marker | Training set                   |          |                 | Validation set                 |          |                 |
|----------------|--------------------------------|----------|-----------------|--------------------------------|----------|-----------------|
|                | Fold change (Case vs. control) | p-value* | AUC (95% CI) †  | Fold change (Case vs. control) | p-value* | AUC (95% CI) †  |
| GDF-15         | 1.68                           | <0.001   | 0.78[0.72-0.85] | 1.42                           | <0.001   | 0.76[0.66-0.88] |
| AR             | 1.34                           | <0.001   | 0.72[0.66-0.80] | 1.32                           | <0.001   | 0.79[0.70-0.90] |
| TRAIL-R2       | 1.23                           | <0.001   | 0.68[0.62-0.76] | 1.28                           | <0.001   | 0.74[0.64-0.87] |
| FasL           | 0.74                           | <0.001   | 0.68[0.61-0.76] | 1.10                           | 0.906    | 0.45[0.35-0.57] |
| IL-6           | 1.56                           | <0.001   | 0.68[0.61-0.77] | 1.48                           | 0.014    | 0.63[0.54-0.79] |
| EGFR           | 0.84                           | <0.001   | 0.68[0.61-0.76] | 0.98                           | 0.723    | 0.47[0.31-0.62] |
| AM             | 1.23                           | <0.001   | 0.68[0.61-0.75] | 1.28                           | 0.004    | 0.68[0.56-0.83] |
| Flt3L          | 0.83                           | <0.001   | 0.65[0.58-0.74] | 0.99                           | 0.557    | 0.50[0.37-0.68] |
| HE4            | 1.24                           | <0.001   | 0.65[0.59-0.74] | 1.19                           | 0.014    | 0.65[0.53-0.80] |
| REG4           | 1.21                           | <0.001   | 0.65[0.59-0.73] | 1.14                           | 0.229    | 0.51[0.32-0.69] |
| TNF-R2         | 1.21                           | <0.001   | 0.64[0.57-0.73] | 1.16                           | 0.014    | 0.64[0.54-0.80] |
| MK             | 1.30                           | <0.001   | 0.63[0.56-0.73] | 1.01                           | 0.772    | 0.45[0.33-0.59] |
| ILT-3          | 1.21                           | <0.001   | 0.63[0.56-0.72] | 1.14                           | 0.043    | 0.62[0.51-0.76] |
| ErbB2-HER2     | 0.86                           | <0.001   | 0.63[0.56-0.72] | 1.10                           | 0.285    | 0.52[0.33-0.70] |
| ITGA1          | 0.84                           | <0.001   | 0.63[0.57-0.72] | 1.08                           | 0.687    | 0.47[0.34-0.61] |
| CEA            | 1.29                           | <0.001   | 0.63[0.56-0.72] | 1.86                           | 0.000    | 0.75[0.65-0.89] |
| VE-statin      | 1.13                           | <0.001   | 0.62[0.55-0.71] | 1.14                           | 0.083    | 0.59[0.50-0.74] |
| VEGF-A         | 1.25                           | 0.001    | 0.61[0.55-0.71] | 1.22                           | 0.171    | 0.54[0.45-0.72] |
| CXCL9          | 1.27                           | 0.001    | 0.61[0.55-0.70] | 1.42                           | 0.040    | 0.60[0.50-0.78] |
| ErbB3-HER3     | 0.89                           | 0.001    | 0.61[0.55-0.71] | 1.04                           | 0.462    | 0.48[0.34-0.64] |
| CSF-1          | 1.11                           | 0.001    | 0.61[0.54-0.70] | 1.14                           | 0.083    | 0.56[0.45-0.74] |
| TNF-R1         | 1.17                           | 0.001    | 0.61[0.55-0.70] | 1.24                           | 0.014    | 0.65[0.54-0.79] |
| PIGF           | 1.11                           | 0.001    | 0.60[0.54-0.69] | 1.12                           | 0.083    | 0.59[0.48-0.75] |
| EZR            | 0.89                           | 0.001    | 0.60[0.54-0.70] | 1.14                           | 0.083    | 0.59[0.49-0.75] |
| CXCL13         | 1.21                           | 0.001    | 0.60[0.54-0.69] | 1.14                           | 0.189    | 0.54[0.41-0.72] |
| GH             | 1.89                           | 0.002    | 0.60[0.53-0.70] | 1.37                           | 0.334    | 0.49[0.34-0.66] |
| NTRK3          | 0.90                           | 0.002    | 0.60[0.53-0.70] | 1.10                           | 0.364    | 0.50[0.35-0.67] |
| CA-125         | 1.34                           | 0.003    | 0.59[0.53-0.69] | 1.29                           | 0.218    | 0.54[0.38-0.72] |
| EPO            | 1.03                           | 0.004    | 0.55[0.51-0.66] | 1.00                           | 0.462    | 0.48[0.37-0.63] |
| ErbB4-HER4     | 0.88                           | 0.004    | 0.59[0.52-0.69] | 1.07                           | 0.750    | 0.45[0.33-0.60] |
| MMP-1          | 1.29                           | 0.005    | 0.59[0.53-0.68] | 1.24                           | 0.363    | 0.49[0.32-0.65] |
| VEGF-D         | 0.90                           | 0.005    | 0.58[0.52-0.68] | 1.05                           | 0.596    | 0.47[0.33-0.63] |
| HGF            | 1.14                           | 0.007    | 0.58[0.51-0.68] | 1.27                           | 0.032    | 0.63[0.53-0.77] |
| IFN-gamma      | 1.10                           | 0.009    | 0.57[0.51-0.67] | 1.16                           | 0.129    | 0.52[0.32-0.70] |
| EMMPRIN        | 0.91                           | 0.010    | 0.57[0.51-0.67] | 1.14                           | 0.675    | 0.47[0.33-0.61] |

Continued on the following page

**Table S2.** Continued

| Protein marker | Training set                   |          |                 | Validation set                 |          |                 |
|----------------|--------------------------------|----------|-----------------|--------------------------------|----------|-----------------|
|                | Fold change (Case vs. control) | p-value* | AUC (95% CI) †  | Fold change (Case vs. control) | p-value* | AUC (95% CI) †  |
| VEGFR-2        | 0.91                           | 0.012    | 0.57[0.51-0.67] | 1.03                           | 0.333    | 0.50[0.32-0.67] |
| ICOSLG         | 0.90                           | 0.016    | 0.57[0.50-0.67] | 1.14                           | 0.396    | 0.49[0.32-0.64] |
| CXCL11         | 1.16                           | 0.035    | 0.56[0.49-0.66] | 1.19                           | 0.298    | 0.50[0.31-0.67] |
| SCF            | 0.93                           | 0.041    | 0.56[0.50-0.66] | 1.01                           | 0.675    | 0.47[0.34-0.62] |
| Ep-CAM         | 0.81                           | 0.057    | 0.55[0.48-0.65] | 0.92                           | 0.870    | 0.44[0.34-0.57] |
| THPO           | 0.90                           | 0.074    | 0.54[0.47-0.64] | 1.14                           | 0.171    | 0.54[0.45-0.71] |
| CAIX           | 1.06                           | 0.083    | 0.55[0.49-0.64] | 1.08                           | 0.723    | 0.48[0.34-0.65] |
| MCP-1          | 0.91                           | 0.143    | 0.53[0.46-0.63] | 1.00                           | 0.928    | 0.45[0.33-0.57] |
| U-PAR          | 1.07                           | 0.187    | 0.52[0.45-0.63] | 1.10                           | 0.126    | 0.57[0.47-0.73] |
| IL-6RA         | 1.11                           | 0.187    | 0.53[0.45-0.63] | 1.05                           | 0.189    | 0.53[0.33-0.71] |
| MIC-A          | 1.02                           | 0.187    | 0.52[0.40-0.62] | 1.27                           | 0.209    | 0.51[0.32-0.70] |
| IL-17RB        | 1.10                           | 0.258    | 0.51[0.38-0.61] | 1.26                           | 0.171    | 0.55[0.44-0.72] |
| IL-12          | 1.09                           | 0.258    | 0.52[0.41-0.62] | 1.19                           | 0.332    | 0.49[0.32-0.66] |
| PECAM-1        | 0.96                           | 0.290    | 0.51[0.40-0.61] | 0.95                           | 0.301    | 0.50[0.31-0.68] |
| PTPN22         | 0.89                           | 0.315    | 0.51[0.39-0.61] | 1.41                           | 0.126    | 0.57[0.45-0.75] |
| hK11           | 1.08                           | 0.323    | 0.50[0.39-0.61] | 1.09                           | 0.353    | 0.51[0.33-0.68] |
| SELE           | 0.91                           | 0.327    | 0.49[0.38-0.59] | 1.28                           | 0.032    | 0.61[0.51-0.78] |
| CSTB           | 1.05                           | 0.378    | 0.50[0.38-0.60] | 1.28                           | 0.083    | 0.60[0.48-0.76] |
| PARK7          | 0.94                           | 0.402    | 0.50[0.40-0.60] | 1.10                           | 0.406    | 0.49[0.33-0.66] |
| TR.AP          | 0.96                           | 0.404    | 0.49[0.39-0.59] | 1.05                           | 0.576    | 0.47[0.33-0.62] |
| FADD           | 0.90                           | 0.426    | 0.50[0.38-0.60] | 1.20                           | 0.498    | 0.49[0.34-0.64] |
| HB-EGF         | 1.03                           | 0.426    | 0.50[0.40-0.60] | 1.06                           | 0.723    | 0.46[0.35-0.61] |
| CDH3           | 1.06                           | 0.434    | 0.50[0.40-0.59] | 1.20                           | 0.209    | 0.55[0.40-0.72] |
| TF             | 1.00                           | 0.474    | 0.50[0.39-0.60] | 1.18                           | 0.371    | 0.50[0.33-0.66] |
| CXCL10         | 1.10                           | 0.477    | 0.50[0.40-0.60] | 1.43                           | 0.083    | 0.56[0.42-0.75] |
| LYN            | 0.92                           | 0.482    | 0.48[0.38-0.58] | 0.80                           | 0.218    | 0.52[0.33-0.70] |
| TNFSF14        | 0.89                           | 0.482    | 0.49[0.38-0.59] | 1.04                           | 0.633    | 0.47[0.35-0.63] |
| VIM            | 0.82                           | 0.485    | 0.49[0.39-0.59] | 1.35                           | 0.189    | 0.55[0.45-0.73] |
| CXCL5          | 0.92                           | 0.505    | 0.49[0.40-0.58] | 0.67                           | 0.129    | 0.57[0.45-0.75] |
| KLK6           | 1.03                           | 0.505    | 0.48[0.39-0.58] | 1.11                           | 0.257    | 0.48[0.29-0.66] |
| CD40-L         | 1.01                           | 0.505    | 0.49[0.40-0.59] | 1.16                           | 0.615    | 0.46[0.34-0.61] |
| CD69           | 1.09                           | 0.525    | 0.49[0.40-0.59] | 0.79                           | 0.298    | 0.51[0.32-0.69] |
| PDGF-subunit-B | 1.05                           | 0.525    | 0.48[0.39-0.58] | 1.01                           | 0.952    | 0.45[0.34-0.57] |
| FS             | 1.05                           | 0.543    | 0.49[0.40-0.59] | 1.14                           | 0.076    | 0.60[0.48-0.75] |
| IL-2           | 1.00                           | 0.543    | 0.48[0.46-0.55] | 1.00                           | 0.952    | 0.46[0.42-0.55] |
| MYD88          | 0.87                           | 0.574    | 0.48[0.39-0.58] | 0.99                           | 0.782    | 0.46[0.31-0.61] |
| TNFRSF4        | 1.00                           | 0.597    | 0.49[0.40-0.58] | 1.14                           | 0.293    | 0.51[0.35-0.68] |

Continued on the following page

**Table S2.** Continued

| Protein marker | Training set                   |          |                 | Validation set                 |          |                 |
|----------------|--------------------------------|----------|-----------------|--------------------------------|----------|-----------------|
|                | Fold change (Case vs. control) | p-value* | AUC (95% CI) †  | Fold change (Case vs. control) | p-value* | AUC (95% CI) †  |
| IL-7           | 1.04                           | 0.597    | 0.47[0.39-0.57] | 1.09                           | 0.490    | 0.49[0.33-0.65] |
| FUR            | 1.00                           | 0.597    | 0.48[0.39-0.57] | 1.02                           | 0.584    | 0.48[0.34-0.64] |
| NEMO           | 0.95                           | 0.608    | 0.48[0.40-0.56] | 0.73                           | 0.257    | 0.51[0.32-0.69] |
| TNF            | 1.00                           | 0.609    | 0.48[0.42-0.58] | 1.00                           | 0.729    | 0.47[0.38-0.62] |
| CASP-3         | 0.86                           | 0.661    | 0.47[0.39-0.55] | 0.83                           | 0.219    | 0.52[0.35-0.70] |
| LAP-TGF-beta1  | 1.02                           | 0.663    | 0.48[0.40-0.56] | 1.02                           | 0.490    | 0.49[0.34-0.65] |
| FR-alpha       | 1.02                           | 0.664    | 0.48[0.40-0.57] | 0.94                           | 0.841    | 0.45[0.32-0.59] |
| TIE2           | 1.03                           | 0.686    | 0.47[0.40-0.56] | 1.09                           | 0.129    | 0.57[0.46-0.73] |
| CDKN1A         | 0.99                           | 0.752    | 0.48[0.40-0.56] | 0.79                           | 0.129    | 0.57[0.47-0.74] |
| CCL19          | 0.99                           | 0.752    | 0.47[0.40-0.55] | 1.21                           | 0.229    | 0.51[0.32-0.68] |
| eIF-4B         | 1.02                           | 0.752    | 0.47[0.40-0.56] | 0.99                           | 0.931    | 0.44[0.33-0.57] |
| PRL            | 1.02                           | 0.752    | 0.48[0.41-0.57] | 0.97                           | 0.952    | 0.44[0.33-0.56] |
| MIA            | 1.00                           | 0.765    | 0.47[0.40-0.54] | 1.07                           | 0.334    | 0.49[0.32-0.66] |
| IL-8           | 0.84                           | 0.779    | 0.46[0.39-0.55] | 1.94                           | 0.219    | 0.54[0.42-0.71] |
| FAS            | 1.07                           | 0.821    | 0.47[0.40-0.56] | 1.12                           | 0.108    | 0.57[0.45-0.74] |
| LITAF          | 0.94                           | 0.828    | 0.47[0.40-0.54] | 1.22                           | 0.137    | 0.56[0.44-0.72] |
| TGF-alpha      | 0.98                           | 0.931    | 0.47[0.40-0.55] | 1.30                           | 0.189    | 0.54[0.41-0.71] |
| PRSS8          | 1.03                           | 0.940    | 0.47[0.40-0.54] | 1.29                           | 0.025    | 0.63[0.51-0.81] |
| BAFF           | 0.99                           | 0.942    | 0.47[0.41-0.54] | 1.02                           | 0.396    | 0.49[0.32-0.65] |
| IL-1ra         | 0.96                           | 0.949    | 0.47[0.40-0.54] | 1.26                           | 0.193    | 0.54[0.41-0.71] |

Abbreviation: AUC, area under the curve; CRC, colorectal cancer; 95% CI, 95% confidence interval.

\* p-values were adjusted by multiple testing (Benjamini-Hochberg method)

† AUCs were adjusted by .632+ bootstrap method, and 95% confidence intervals were derived from 1,000 bootstrap samples.

**Table S3.** Diagnostic performance of 92 protein biomarkers for detecting advanced adenoma in the validation set

| Protein marker | Median (Cq value) |                  | Fold change | p-value* | AUC (95% CI) †   |
|----------------|-------------------|------------------|-------------|----------|------------------|
|                | Advanced adenoma  | Free of neoplasm |             |          |                  |
| AM             | 7.4               | 7.2              | 1.10        | 0.74     | 0.50 [0.35-0.63] |
| AR             | 3.1               | 3.0              | 1.08        | 0.68     | 0.53 [0.44-0.66] |
| BAFF           | 6.8               | 6.7              | 1.02        | 0.89     | 0.47 [0.38-0.58] |
| CA-125         | 2.5               | 2.5              | 1.00        | 0.93     | 0.46 [0.38-0.57] |
| CAIX           | 2.8               | 2.8              | 0.95        | 0.86     | 0.45 [0.37-0.56] |
| CASP.3         | 12.1              | 12.1             | 0.99        | 0.86     | 0.46 [0.37-0.56] |
| CCL19          | 10.2              | 10.0             | 1.15        | 0.68     | 0.54 [0.46-0.66] |
| CD40L          | 8.3               | 8.3              | 1.01        | 0.93     | 0.46 [0.38-0.55] |
| CD69           | 8.4               | 8.4              | 1.00        | 0.86     | 0.47 [0.38-0.58] |
| CDH3           | 2.3               | 2.1              | 1.11        | 0.68     | 0.51 [0.37-0.64] |
| CDKN1A         | 1.9               | 1.8              | 1.08        | 0.93     | 0.46 [0.38-0.55] |
| CEA            | 2.9               | 2.7              | 1.15        | 0.74     | 0.50 [0.36-0.63] |
| CSF-1          | 8.7               | 8.7              | 1.03        | 0.83     | 0.47 [0.35-0.59] |
| CSTB           | 8.0               | 7.7              | 1.21        | 0.68     | 0.54 [0.43-0.68] |
| CXCL10         | 8.0               | 8.0              | 1.00        | 0.90     | 0.46 [0.38-0.55] |
| CXCL11         | 5.7               | 5.6              | 1.04        | 0.83     | 0.48 [0.36-0.60] |
| CXCL13         | 9.4               | 9.3              | 1.05        | 0.78     | 0.50 [0.37-0.63] |
| CXCL5          | 9.2               | 9.2              | 1.02        | 0.84     | 0.47 [0.37-0.58] |
| CXCL9          | 7.5               | 7.4              | 1.06        | 0.83     | 0.48 [0.37-0.61] |

|            |      |      |      |      |                  |
|------------|------|------|------|------|------------------|
| EGFR       | 5.8  | 5.7  | 1.05 | 0.98 | 0.46 [0.38-0.55] |
| eIF4B      | 7.5  | 7.4  | 1.13 | 0.75 | 0.49 [0.36-0.62] |
| EMMPRIN    | 7.2  | 7.1  | 1.07 | 0.86 | 0.46 [0.38-0.57] |
| Ep-CAM     | 11.2 | 11.0 | 1.15 | 0.74 | 0.50 [0.35-0.62] |
| EPO        | 0.4  | 0.4  | 1.00 | 0.95 | 0.47 [0.40-0.56] |
| ErbB2.HER2 | 9.1  | 9.0  | 1.05 | 0.83 | 0.48 [0.36-0.61] |
| ErbB3.HER3 | 9.1  | 9.0  | 1.06 | 0.74 | 0.49 [0.36-0.62] |
| ErbB4.HER4 | 6.0  | 6.0  | 1.03 | 0.86 | 0.47 [0.39-0.57] |
| EZR        | 6.3  | 6.3  | 1.05 | 0.83 | 0.47 [0.37-0.58] |
| FADD       | 4.1  | 3.9  | 1.15 | 0.73 | 0.52 [0.42-0.64] |
| FAS        | 9.0  | 8.8  | 1.11 | 0.68 | 0.51 [0.35-0.65] |
| FasL       | 2.6  | 2.5  | 1.08 | 0.84 | 0.47 [0.36-0.58] |
| Flt3L      | 9.2  | 9.1  | 1.09 | 0.98 | 0.47 [0.38-0.58] |
| FR-alpha   | 5.1  | 5.1  | 1.00 | 0.98 | 0.46 [0.38-0.55] |
| FS         | 5.8  | 5.7  | 1.08 | 0.68 | 0.51 [0.36-0.64] |
| FUR        | 7.8  | 7.7  | 1.01 | 0.89 | 0.46 [0.38-0.57] |
| GDF-15     | 9.5  | 9.3  | 1.10 | 0.68 | 0.52 [0.40-0.65] |
| GH         | 8.4  | 7.9  | 1.42 | 0.83 | 0.48 [0.36-0.60] |
| HB-EGF     | 9.1  | 9.0  | 1.02 | 0.86 | 0.47 [0.38-0.57] |

---

Continued on the following page



**Table S3.** Continued

| Protein marker | Median (Cq value) |                  | Fold change | p-value* | AUC (95% CI) <sup>†</sup> |
|----------------|-------------------|------------------|-------------|----------|---------------------------|
|                | Advanced adenoma  | Free of neoplasm |             |          |                           |
| HE4            | 7.5               | 7.4              | 1.08        | 0.68     | 0.52 [0.39-0.65]          |
| HGF            | 8.3               | 8.2              | 1.12        | 0.83     | 0.48 [0.37-0.60]          |
| hK11           | 5.8               | 5.7              | 1.02        | 0.83     | 0.48 [0.38-0.60]          |
| ICOSLG         | 4.2               | 4.1              | 1.06        | 0.83     | 0.47 [0.38-0.59]          |
| IFN-gamma      | 1.6               | 1.5              | 1.07        | 0.86     | 0.48 [0.38-0.59]          |
| IL12           | 8.7               | 8.5              | 1.12        | 0.74     | 0.49 [0.36-0.61]          |
| IL17RB         | 2.3               | 2.2              | 1.07        | 0.86     | 0.47 [0.38-0.58]          |
| IL1ra          | 7.2               | 7.1              | 1.07        | 0.68     | 0.51 [0.37-0.64]          |
| IL2            | 1.0               | 1.0              | 1.00        | 0.93     | 0.46 [0.45-0.53]          |
| IL6            | 4.8               | 4.5              | 1.22        | 0.68     | 0.50 [0.35-0.64]          |
| IL6RA          | 7.4               | 7.4              | 1.04        | 0.74     | 0.49 [0.36-0.62]          |
| IL7            | 1.6               | 1.6              | 1.01        | 0.86     | 0.47 [0.38-0.58]          |
| IL8            | 8.0               | 8.0              | 1.04        | 1.00     | 0.46 [0.38-0.55]          |
| ILT3           | 3.0               | 3.0              | 0.99        | 0.76     | 0.50 [0.37-0.63]          |
| ITGA1          | 7.9               | 7.8              | 1.04        | 0.86     | 0.46 [0.38-0.57]          |
| KLK6           | 5.8               | 5.8              | 1.03        | 0.93     | 0.46 [0.39-0.57]          |
| LAP-TGF-beta.1 | 6.9               | 6.9              | 0.97        | 0.95     | 0.46 [0.37-0.56]          |
| LITAF          | 2.3               | 2.1              | 1.15        | 0.83     | 0.48 [0.37-0.61]          |
| LYN            | 3.2               | 3.4              | 0.89        | 0.83     | 0.47 [0.37-0.60]          |
| MCP1           | 10.5              | 10.5             | 1.02        | 0.93     | 0.47 [0.39-0.57]          |

|               |     |     |      |      |                  |
|---------------|-----|-----|------|------|------------------|
| MIA           | 5.1 | 5.1 | 1.00 | 0.83 | 0.48 [0.37-0.60] |
| MICA          | 4.2 | 4.2 | 0.96 | 0.86 | 0.48 [0.38-0.60] |
| MK            | 8.1 | 8.1 | 1.00 | 0.89 | 0.46 [0.38-0.56] |
| MMP1          | 8.5 | 8.4 | 1.12 | 0.86 | 0.46 [0.38-0.56] |
| MYD88         | 2.9 | 2.8 | 1.08 | 0.74 | 0.51 [0.37-0.63] |
| NEMO          | 6.6 | 6.4 | 1.14 | 0.83 | 0.48 [0.37-0.59] |
| NTRK3         | 7.9 | 7.8 | 1.05 | 0.83 | 0.47 [0.37-0.58] |
| PARK7         | 8.5 | 8.5 | 1.01 | 0.84 | 0.47 [0.37-0.58] |
| PDGFsubunit.B | 8.6 | 8.5 | 1.01 | 0.98 | 0.46 [0.38-0.55] |
| PECAM1        | 7.5 | 7.5 | 1.00 | 0.95 | 0.46 [0.38-0.56] |
| PIGF          | 7.0 | 6.9 | 1.09 | 0.73 | 0.50 [0.36-0.63] |
| PRL           | 5.1 | 5.1 | 1.00 | 0.83 | 0.49 [0.37-0.60] |
| PRSS8         | 9.5 | 9.3 | 1.13 | 0.68 | 0.51 [0.35-0.64] |
| PTPN22        | 4.8 | 4.5 | 1.30 | 0.68 | 0.52 [0.39-0.65] |
| REG4          | 4.6 | 4.5 | 1.05 | 0.83 | 0.49 [0.37-0.61] |
| SCF           | 8.5 | 8.4 | 1.03 | 0.84 | 0.47 [0.38-0.57] |
| SELE          | 7.5 | 7.5 | 1.04 | 0.86 | 0.47 [0.38-0.59] |
| TF            | 5.9 | 5.6 | 1.16 | 0.68 | 0.51 [0.35-0.64] |
| TGFalpha      | 4.3 | 4.3 | 1.00 | 0.83 | 0.48 [0.36-0.59] |

---

Continued on the following page

**Table S3.** Continued

| Protein marker | Median           |                  | Fold change | p-value* | AUC (95% CI) <sup>†</sup> |
|----------------|------------------|------------------|-------------|----------|---------------------------|
|                | Advanced adenoma | Free of neoplasm |             |          |                           |
| THPO           | 3.2              | 3.1              | 1.09        | 0.83     | 0.47 [0.36-0.59]          |
| TIE2           | 6.1              | 6.0              | 1.05        | 0.76     | 0.49 [0.36-0.61]          |
| TNF            | 0.3              | 0.3              | 1.00        | 0.83     | 0.49 [0.41-0.60]          |
| TNFR1          | 12.2             | 12.0             | 1.11        | 0.73     | 0.50 [0.36-0.62]          |
| TNFR2          | 5.5              | 5.4              | 1.08        | 0.73     | 0.51 [0.36-0.64]          |
| TNFRSF4        | 3.7              | 3.5              | 1.11        | 0.68     | 0.54 [0.41-0.67]          |
| TNFSF14        | 3.5              | 3.5              | 0.97        | 0.93     | 0.46 [0.38-0.55]          |
| TRAP           | 6.4              | 6.3              | 1.07        | 0.83     | 0.47 [0.37-0.58]          |
| TRAILR2        | 4.5              | 4.3              | 1.09        | 0.68     | 0.52 [0.40-0.65]          |
| UPAR           | 10.6             | 10.5             | 1.03        | 0.83     | 0.48 [0.37-0.60]          |
| VEstatin       | 0.0              | 0.0              | 1.02        | 0.83     | 0.47 [0.37-0.59]          |
| VEGFA          | 10.7             | 10.7             | 0.99        | 0.84     | 0.47 [0.37-0.58]          |
| VEGFD          | 6.8              | 6.8              | 0.98        | 0.86     | 0.47 [0.38-0.58]          |
| VEGFR2         | 8.1              | 8.0              | 1.08        | 0.68     | 0.51 [0.36-0.64]          |
| VIM            | 5.7              | 5.8              | 0.99        | 0.93     | 0.46 [0.38-0.55]          |

Abbreviation: AUC, area under the curve; CRC, colorectal cancer; 95% CI, 95% confidence interval.

\* p-values were adjusted by multiple testing (Benjamini-Hochberg method)

<sup>†</sup> AUCs were adjusted by .632+ bootstrap method, and 95% CIs were derived from 1000 bootstrap samples

**Table S4.** Diagnostic performance of multi-marker panels for detecting colorectal cancer in the test set stratified by sex

| Gender | Marker                                            | AUC (95% CI) <sup>†</sup> | Sensitivity (95% CI) <sup>†</sup> |                    |
|--------|---------------------------------------------------|---------------------------|-----------------------------------|--------------------|
|        |                                                   |                           | at 90% specificity                | at 80% specificity |
| Male   | <b>(a) CRC vs. participants free of neoplasm</b>  |                           |                                   |                    |
|        | 4 protein panel                                   | 0.76 (0.64-0.86)          | 34.5 (10.3-69.0)                  | 55.2 (31.0-79.3)   |
|        | 4-protein panel + anti-TP53                       | 0.80 (0.67-0.89)          | 57.1 (14.3-71.4)                  | 57.1 (39.2-78.6)   |
|        | <b>(b) advanced adenomas vs. free of neoplasm</b> |                           |                                   |                    |
|        | 4 protein panel                                   | 0.57 (0.45-0.68)          | 17.9 (7.1-37.5)                   | 28.6 (28.6-44.6)   |
|        | 4-protein panel + anti-TP53                       | 0.63 (0.51-0.74)          | 32.6 (11.6-46.5)                  | 34.9 (20.9-55.8)   |
| Female | <b>(a) CRC vs. free of neoplasm</b>               |                           |                                   |                    |
|        | 4 protein panel                                   | 0.83 (0.67-0.95)          | 58.3 (25.0-91.0)                  | 75.0 (41.7-100.0)  |
|        | 4-protein panel + anti-TP53                       | 0.83 (0.67-0.95)          | 63.6 (27.3-90.9)                  | 72.7 (45.5-100.0)  |
|        | <b>(b) advanced adenomas vs. free of neoplasm</b> |                           |                                   |                    |
|        | 4 protein panel                                   | 0.57 (0.46-0.67)          | 10.0 (2.0-24.0)                   | 18.0 (6.0-42.0)    |
|        | 4-protein panel + anti-TP53                       | 0.57 (0.45-0.68)          | 17.9 (2.6-30.8)                   | 20.5 (7.7-41.0)    |

Abbreviation: AUC, area under the curve; CRC, colorectal cancer; 95% CI, 95% confidence interval.

<sup>†</sup> AUCs were adjusted by .632+ bootstrap method, and 95% confidence intervals were derived from 1,000 bootstrap samples.

**Table S5.** Diagnostic performance of multi-marker panel for detecting colorectal cancer in the test set from a screening setting stratified by age

| Age        | Marker                                            | AUC (95% CI) <sup>†</sup> | Sensitivity (95% CI) <sup>†</sup> |                    |
|------------|---------------------------------------------------|---------------------------|-----------------------------------|--------------------|
|            |                                                   |                           | at 90% specificity                | at 80% specificity |
| <65 years  | <b>(a) CRC vs. free of neoplasm</b>               |                           |                                   |                    |
|            | 4 protein panel                                   | 0.82 (0.70-0.92)          | 50.0 (27.8-72.2)                  | 61.1 (33.3-88.9)   |
|            | 4-protein panel + anti-TP53                       | 0.85 (0.75-0.94)          | 47.1 (23.5-82.3)                  | 76.5 (41.2-94.1)   |
|            | <b>(b) advanced adenomas vs. free of neoplasm</b> |                           |                                   |                    |
|            | 4 protein panel                                   | 0.61 (0.52-0.70)          | 13.2 (5.9-23.5)                   | 23.5 (8.8-52.9)    |
|            | 4-protein panel + anti-TP53                       | 0.63 (0.52-0.73)          | 15.4 (5.8-40.4)                   | 38.5 (13.5-57.7)   |
| ≥ 65 years | <b>(a) CRC vs. free of neoplasm</b>               |                           |                                   |                    |
|            | 4 protein panel                                   | 0.77 (0.64-0.88)          | 30.4 (8.7-69.6)                   | 60.9 (21.7-82.7)   |
|            | 4-protein panel + anti-TP53                       | 0.77 (0.63-0.88)          | 45.5 (18.2-81.8)                  | 63.6 (36.4-86.4)   |
|            | <b>(b) advanced adenomas vs. free of neoplasm</b> |                           |                                   |                    |
|            | 4 protein panel                                   | 0.55 (0.42-0.67)          | 18.4 (2.6-36.8)                   | 31.6 (10.5-47.4)   |
|            | 4-protein panel + anti-TP53                       | 0.57 (0.41-0.71)          | 30.0 (0-53.3)                     | 36.7 (20.0-60.0)   |

Abbreviation: AUC, area under the curve; CRC, colorectal cancer; 95% CI, 95% confidence interval.

<sup>†</sup> AUCs were adjusted by .632+ bootstrap method, and 95% confidence intervals were derived from 1,000 bootstrap samples.

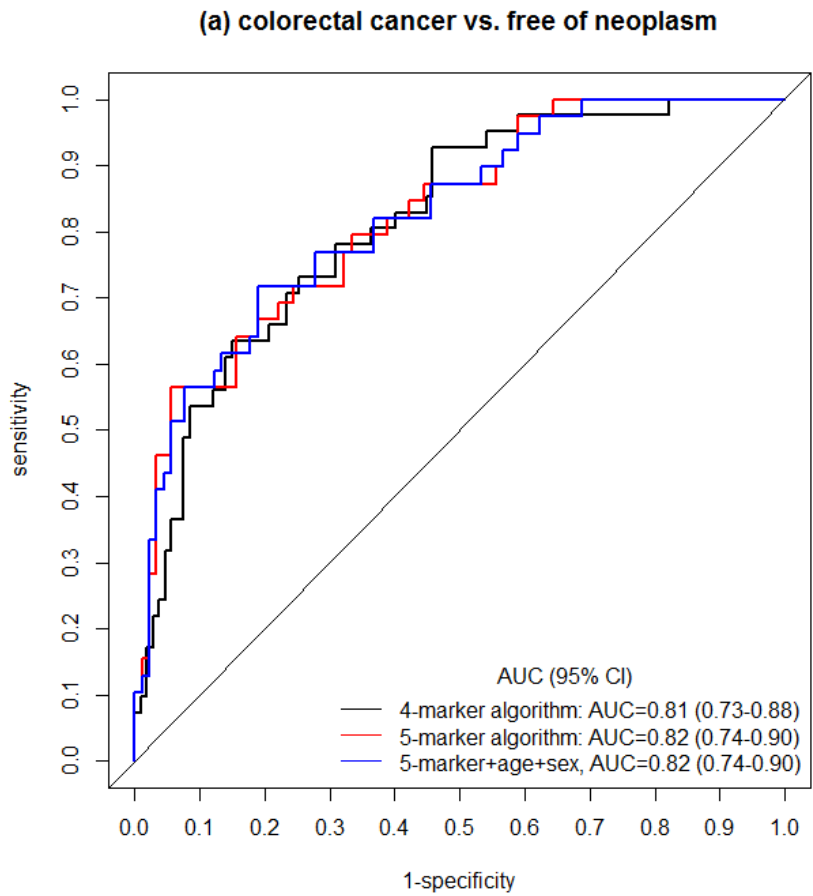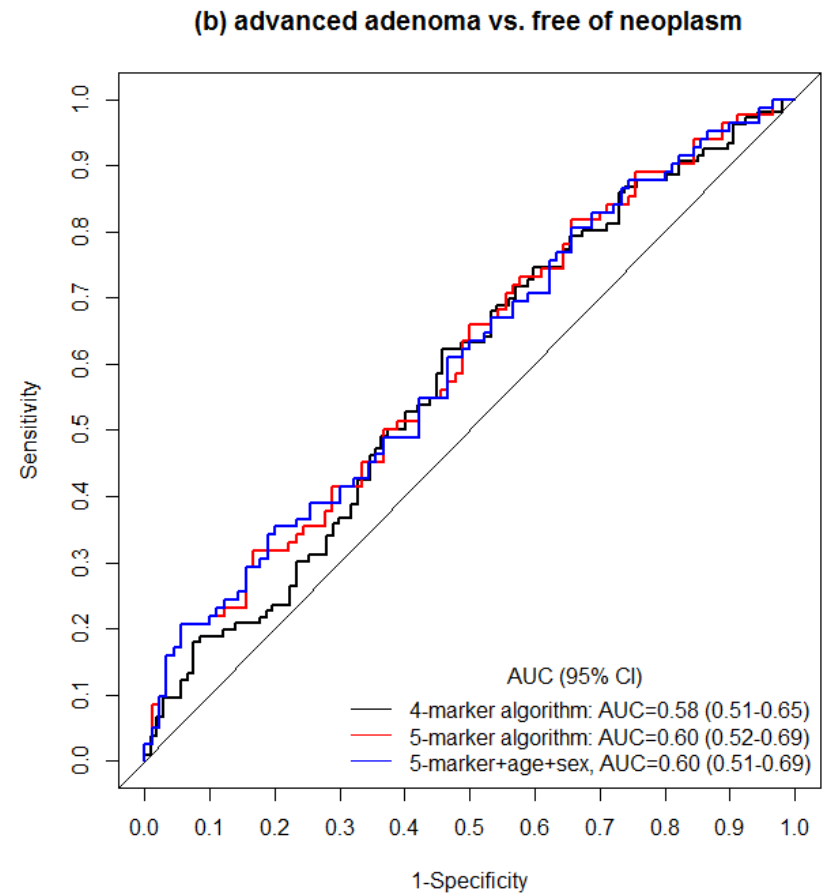

**Figure S1.** Receiver operating characteristics curves comparing different models (four-marker panel, five-marker panel, and five-marker panel combined with age and sex) for detecting a) colorectal cancer vs. free of neoplasm s; b) advanced adenomas vs. free of neoplasm.
